# Supplementary material for: Spectral Characteristics and Functional Responses of Phospholipid Bilayers in the Terahertz Band
Source: MDPI journal article supplement (doi:10.3390/ijms24087111), 2023-04-12
Supplement: s1 [file s1]

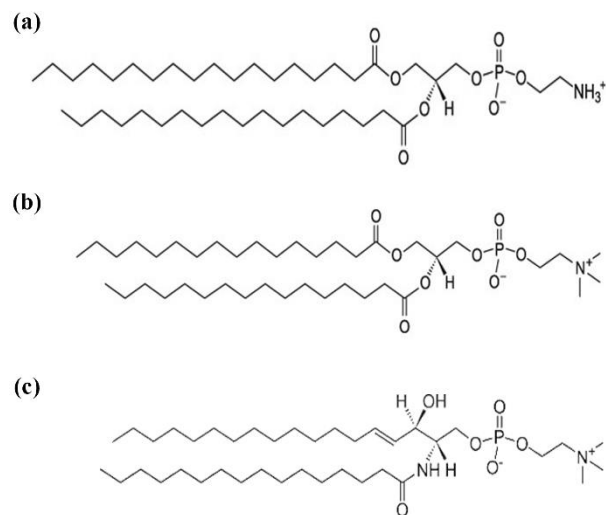

**Figure S1.** Chemical structures of (a) DSPE, (b) DPPC, and (c) SPH.

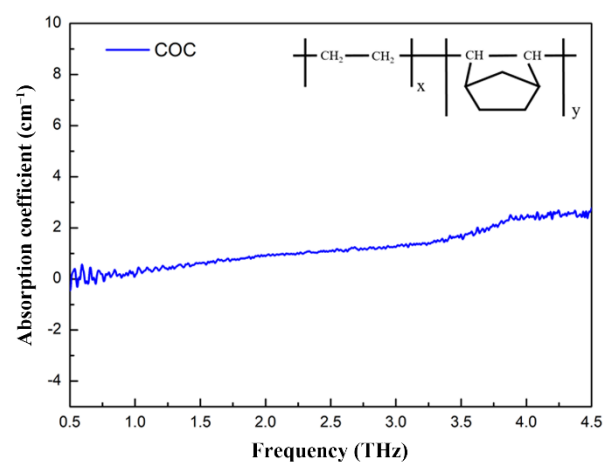

**Figure S2.** THz absorption spectrum of COC in the 0.5–4.0 THz range at 293 K.

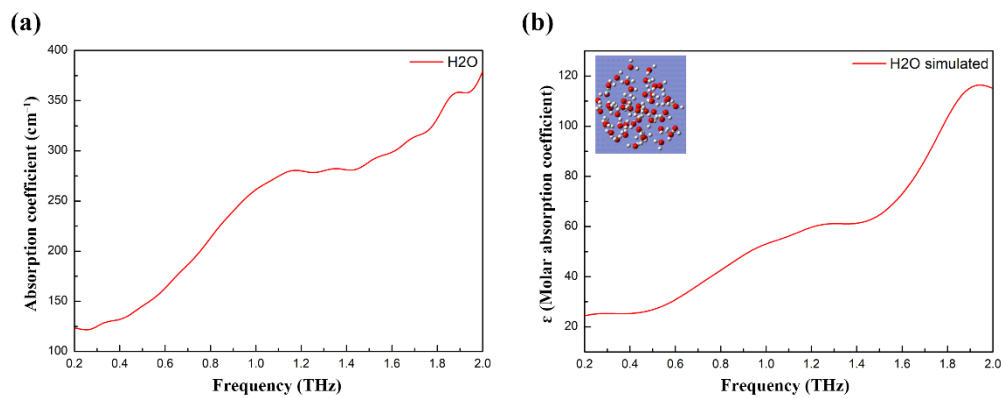

**Figure S3.** Experimentally and theoretically evaluated THz absorption spectra of H<sub>2</sub>O. **(a)** Experimentally measured THz absorption spectra of H<sub>2</sub>O at 293 K. **(b)** Theoretically calculated THz absorption spectra of 50 H<sub>2</sub>O clusters; the inset shows the predicted molecular structure of the 50 H<sub>2</sub>O clusters following geometry optimization.

**Table S1.** The vibrational modes of DSPE, DPPC, and SPH. (33.33 cm<sup>-1</sup> = 1 THz)

| NUM | Harmonic frequencies (cm <sup>-1</sup> ) |        |        | IR intensities (KM/Mole) |        |        |
|-----|------------------------------------------|--------|--------|--------------------------|--------|--------|
|     | DPPC                                     | DSPE   | SPH    | DPPC                     | DSPE   | SPH    |
| 1   | 9.19                                     | 4.16   | 2.17   | 0.4678                   | 0.0273 | 0.0083 |
| 2   | 13.92                                    | 6.63   | 5.31   | 0.3144                   | 0.1952 | 0.9849 |
| 3   | 17.98                                    | 8.89   | 5.65   | 0.3610                   | 0.3101 | 1.2340 |
| 4   | 20.14                                    | 14.38  | 9.31   | 0.3313                   | 0.2093 | 0.2023 |
| 5   | 23.01                                    | 14.47  | 13.10  | 0.5772                   | 0.0083 | 2.0705 |
| 6   | 27.45                                    | 17.63  | 14.98  | 0.5273                   | 0.2393 | 1.1190 |
| 7   | 34.94                                    | 19.85  | 18.57  | 0.0643                   | 0.1362 | 0.1922 |
| 8   | 37.83                                    | 23.47  | 20.18  | 2.9910                   | 0.1209 | 0.3571 |
| 9   | 41.20                                    | 26.97  | 21.68  | 0.0469                   | 0.9497 | 0.7271 |
| 10  | 42.04                                    | 31.87  | 22.73  | 0.3107                   | 0.8109 | 1.3818 |
| 11  | 47.05                                    | 35.06  | 25.70  | 1.1456                   | 0.7038 | 0.7152 |
| 12  | 49.02                                    | 37.03  | 28.32  | 0.2201                   | 1.2139 | 0.2298 |
| 13  | 54.04                                    | 37.40  | 34.84  | 0.3775                   | 0.3914 | 1.6827 |
| 14  | 56.50                                    | 39.45  | 41.96  | 0.4340                   | 0.5055 | 0.6308 |
| 15  | 59.15                                    | 45.16  | 46.35  | 0.2486                   | 0.0089 | 0.4969 |
| 16  | 63.79                                    | 47.73  | 50.68  | 0.0900                   | 0.2186 | 0.0036 |
| 17  | 66.40                                    | 50.15  | 57.65  | 1.0348                   | 0.4428 | 0.0069 |
| 18  | 72.64                                    | 51.42  | 62.32  | 1.9561                   | 1.7507 | 1.4868 |
| 19  | 75.90                                    | 56.09  | 63.91  | 0.6375                   | 0.8935 | 0.1128 |
| 20  | 78.45                                    | 58.63  | 64.66  | 0.0191                   | 0.3758 | 1.4731 |
| 21  | 81.43                                    | 64.42  | 69.45  | 1.5760                   | 1.0291 | 1.4662 |
| 22  | 88.20                                    | 66.37  | 74.52  | 1.3155                   | 0.1770 | 0.2768 |
| 23  | 92.78                                    | 69.35  | 77.80  | 0.1267                   | 2.1942 | 0.4305 |
| 24  | 97.55                                    | 74.76  | 84.54  | 1.0828                   | 3.1492 | 0.5070 |
| 25  | 99.11                                    | 80.51  | 88.77  | 0.6001                   | 0.3409 | 3.6175 |
| 26  | 101.00                                   | 82.79  | 95.25  | 5.7365                   | 1.3764 | 1.4820 |
| 27  | 105.05                                   | 84.49  | 98.46  | 1.6644                   | 1.2524 | 0.9291 |
| 28  | 108.15                                   | 88.88  | 104.23 | 1.2388                   | 0.0812 | 0.7175 |
| 29  | 112.41                                   | 93.45  | 109.31 | 0.3042                   | 0.1543 | 1.1896 |
| 30  | 115.75                                   | 95.27  | 111.91 | 1.6635                   | 0.1441 | 4.0027 |
| 31  | 118.18                                   | 97.22  | 119.15 | 0.2592                   | 0.9431 | 5.3282 |
| 32  | 120.46                                   | 100.53 | 123.02 | 1.9546                   | 1.1216 | 1.7221 |
| 33  | 126.03                                   | 108.38 | 123.91 | 0.2623                   | 0.3852 | 1.5511 |
| 34  | 127.60                                   | 109.75 | 128.58 | 0.6832                   | 1.6613 | 1.7163 |
| 35  | 132.06                                   | 116.28 | 132.14 | 0.1611                   | 3.5963 | 0.6261 |

|    |        |        |        |        |        |        |
|----|--------|--------|--------|--------|--------|--------|
| 36 | 134.81 | 120.78 | 140.86 | 0.2211 | 0.0940 | 0.5613 |
| 37 | 140.59 | 125.31 | 144.04 | 0.7458 | 0.0765 | 2.3715 |
| 38 | 148.26 | 125.71 | 144.99 | 0.2240 | 0.1690 | 1.5553 |

---
